# Supplementary material for: Tuning the electronic properties and quantum efficiency of blue Ir(iii) carbene complexes via different azole-pyridine-based N^N′ ligands
Source: Royal Society of Chemistry journal article supplement (doi:10.1039/c3ra46804f), 2013-12-20
Supplement: c3ra46804f.pdf [file c3ra46804f.pdf]

## Supporting Information

### **Tuning the electronic properties and quantum efficiency of blue Ir(III) carbene complexes via different azole-pyridine-based N<sup>^</sup>N<sup>'</sup> ligands**

Yuqi Liu,<sup>a</sup> Xiaobo Sun,<sup>b</sup> Yanling Si,<sup>a, c</sup> Xiaochun Qu,<sup>a</sup> Ying Wang, <sup>\*,a</sup> and Zhijian Wu <sup>\*,a</sup>

<sup>a</sup> State Key Laboratory of Rare Earth Resource Utilization, Changchun Institute of Applied Chemistry, Chinese Academy of Sciences, Changchun 130022, People's Republic of China.

<sup>b</sup> Department of Applied Chemistry, Qingdao Agricultural University, Qingdao 266109, People's Republic of China.

<sup>c</sup> College of Resource and Environmental Science Jilin Agricultural University, Changchun, Jilin 130118, People's Republic of China.

\* Corresponding authors. Email: [ywang\\_2012@ciac.ac.cn](mailto:ywang_2012@ciac.ac.cn) (YW), [zjwu@ciac.ac.cn](mailto:zjwu@ciac.ac.cn) (ZJW); Tel: +86-431-85682801

**Table S1** Frontier molecular orbital energies (eV) and compositions (%) of different fragments in the ground state for complex **1a**

| MO <sup>a</sup> | Energy/eV | MO composition(%) <sup>b</sup> |       |       |      | Assign                                      |
|-----------------|-----------|--------------------------------|-------|-------|------|---------------------------------------------|
|                 |           | Ir                             | fpmi1 | fpmi2 | pyN1 |                                             |
| L+5             | 0.64      | 7                              | 21    | 70    | 2    | $\pi^*(\text{fpmi})$                        |
| L+4             | 0.37      | 6                              | 69    | 22    | 3    | $\pi^*(\text{fpmi})$                        |
| L+3             | 0.13      | 5                              | 24    | 70    | 0    | $\pi^*(\text{fpmi})$                        |
| L+2             | -0.02     | 7                              | 65    | 22    | 5    | $\pi^*(\text{fpmi})$                        |
| L+1             | -0.32     | 1                              | 3     | 2     | 94   | $\pi^*(\text{pyN1})$                        |
| L               | -0.76     | 3                              | 0     | 1     | 96   | $\pi^*(\text{pyN1})$                        |
| H               | -5.00     | 3                              | 1     | 1     | 94   | $\pi(\text{pyN1})$                          |
| H-1             | -5.21     | 35                             | 17    | 34    | 13   | $d(\text{Ir})+\pi(\text{fpmi}+\text{pyN1})$ |
| H-2             | -5.40     | 32                             | 21    | 10    | 36   | $d(\text{Ir})+\pi(\text{fpmi}+\text{pyN1})$ |
| H-3             | -5.75     | 11                             | 42    | 34    | 12   | $d(\text{Ir})+\pi(\text{fpmi}+\text{pyN1})$ |
| H-4             | -5.95     | 26                             | 22    | 43    | 9    | $d(\text{Ir})+\pi(\text{fpmi})$             |
| H-5             | -6.27     | 27                             | 47    | 20    | 5    | $d(\text{Ir})+\pi(\text{fpmi})$             |

<sup>a</sup> H = HOMO; L = LUMO. <sup>b</sup> fpmi1 and fpmi2 are the same ligands, but in different positions, Fig. 1. pyN1 = 2-(1*H*-pyrrol-2-yl)pyridinato, Scheme 1.

**Table S2** Frontier molecular orbital energies (eV) and compositions (%) of different fragments in the ground state for complex **2a**

| MO <sup>a</sup> | Energy/eV | MO composition(%) <sup>b</sup> |       |       |      | Assign                                      |
|-----------------|-----------|--------------------------------|-------|-------|------|---------------------------------------------|
|                 |           | Ir                             | fpmi1 | fpmi2 | pyN2 |                                             |
| L+5             | 0.71      | 6                              | 10    | 82    | 1    | $\pi^*(\text{fpmi})$                        |
| L+4             | 0.35      | 6                              | 80    | 11    | 3    | $\pi^*(\text{fpmi})$                        |
| L+3             | 0.17      | 6                              | 5     | 88    | 1    | $\pi^*(\text{fpmi2})$                       |
| L+2             | -0.05     | 8                              | 86    | 4     | 2    | $\pi^*(\text{fpmi1})$                       |
| L+1             | -0.61     | 1                              | 1     | 1     | 97   | $\pi^*(\text{pyN2})$                        |
| L               | -1.07     | 3                              | 1     | 1     | 96   | $\pi^*(\text{pyN2})$                        |
| H               | -5.20     | 33                             | 15    | 46    | 5    | $d(\text{Ir})+\pi(\text{fpmi})$             |
| H-1             | -5.45     | 32                             | 19    | 14    | 34   | $d(\text{Ir})+\pi(\text{fpmi}+\text{pyN2})$ |
| H-2             | -5.69     | 11                             | 26    | 23    | 40   | $d(\text{Ir})+\pi(\text{fpmi}+\text{pyN2})$ |
| H-3             | -5.90     | 7                              | 18    | 11    | 65   | $\pi(\text{fpmi}+\text{pyN2})$              |
| H-4             | -5.94     | 25                             | 23    | 44    | 8    | $d(\text{Ir})+\pi(\text{fpmi})$             |
| H-5             | -6.27     | 25                             | 43    | 24    | 7    | $d(\text{Ir})+\pi(\text{fpmi})$             |

<sup>a</sup> H = HOMO; L = LUMO. <sup>b</sup> fpmi1 and fpmi2 are the same ligands, but in different positions, Fig. 1. pyN2 = 2-(1*H*-pyrazol-5-yl)pyridinato, Scheme 1.

**Table S3** Frontier molecular orbital energies (eV) and compositions (%) of different fragments in the ground state for complex **3a**

| MO <sup>a</sup> | Energy/eV | MO composition(%) <sup>b</sup> |       |       |      | Assign                                      |
|-----------------|-----------|--------------------------------|-------|-------|------|---------------------------------------------|
|                 |           | Ir                             | fpmi1 | fpmi2 | pyN3 |                                             |
| L+5             | 0.59      | 6                              | 10    | 82    | 1    | $\pi^*(\text{fpmi})$                        |
| L+4             | 0.23      | 6                              | 79    | 12    | 3    | $\pi^*(\text{fpmi})$                        |
| L+3             | 0.05      | 6                              | 6     | 87    | 1    | $\pi^*(\text{fpmi2})$                       |
| L+2             | -0.16     | 8                              | 85    | 4     | 3    | $\pi^*(\text{fpmi1})$                       |
| L+1             | -0.73     | 1                              | 1     | 1     | 97   | $\pi^*(\text{pyN3})$                        |
| L               | -1.23     | 3                              | 1     | 1     | 96   | $\pi^*(\text{pyN3})$                        |
| H               | -5.34     | 33                             | 17    | 47    | 3    | $d(\text{Ir})+\pi(\text{fpmi})$             |
| H-1             | -5.65     | 29                             | 26    | 22    | 23   | $d(\text{Ir})+\pi(\text{fpmi}+\text{pyN3})$ |
| H-2             | -5.86     | 15                             | 28    | 24    | 33   | $d(\text{Ir})+\pi(\text{fpmi}+\text{pyN3})$ |
| H-3             | -6.08     | 22                             | 25    | 41    | 12   | $d(\text{Ir})+\pi(\text{fpmi}+\text{pyN3})$ |
| H-4             | -6.33     | 23                             | 28    | 17    | 32   | $d(\text{Ir})+\pi(\text{fpmi}+\text{pyN3})$ |
| H-5             | -6.43     | 22                             | 23    | 35    | 20   | $d(\text{Ir})+\pi(\text{fpmi}+\text{pyN3})$ |

<sup>a</sup> H = HOMO; L = LUMO. <sup>b</sup> fpmi1 and fpmi2 are the same ligands, but in different positions, Fig. 1. pyN3 = 2-(1*H*-1,2,4-triazol-5-yl)pyridinato, Scheme 1.

**Table S4** Frontier molecular orbital energies (eV) and compositions (%) of different fragments in the ground state for complex **4a**

| MO <sup>a</sup> | Energy/eV | MO composition(%) <sup>b</sup> |       |       |      | Assign                                      |
|-----------------|-----------|--------------------------------|-------|-------|------|---------------------------------------------|
|                 |           | Ir                             | fpmi1 | fpmi2 | pyN4 |                                             |
| L+4             | 0.08      | 6                              | 79    | 12    | 3    | $\pi^*(\text{fpmi})$                        |
| L+3             | -0.09     | 7                              | 7     | 86    | 1    | $\pi^*(\text{fpmi2})$                       |
| L+2             | -0.32     | 9                              | 84    | 4     | 2    | $\pi^*(\text{fpmi1})$                       |
| L+1             | -1.00     | 1                              | 1     | 1     | 97   | $\pi^*(\text{pyN4})$                        |
| L               | -1.50     | 3                              | 1     | 1     | 96   | $\pi^*(\text{pyN4})$                        |
| H               | -5.50     | 31                             | 18    | 48    | 3    | $d(\text{Ir})+\pi(\text{fpmi})$             |
| H-1             | -5.87     | 20                             | 38    | 37    | 4    | $d(\text{Ir})+\pi(\text{fpmi})$             |
| H-2             | -6.15     | 33                             | 34    | 24    | 9    | $d(\text{Ir})+\pi(\text{fpmi})$             |
| H-3             | -6.33     | 27                             | 11    | 45    | 17   | $d(\text{Ir})+\pi(\text{fpmi}+\text{pyN4})$ |
| H-4             | -6.54     | 27                             | 45    | 20    | 8    | $d(\text{Ir})+\pi(\text{fpmi})$             |
| H-5             | -6.77     | 3                              | 3     | 19    | 76   | $\pi(\text{fpmi2}+\text{pyN4})$             |
| H-6             | -6.83     | 4                              | 63    | 25    | 7    | $\pi(\text{fpmi})$                          |

<sup>a</sup> H = HOMO; L = LUMO. <sup>b</sup> fpmi1 and fpmi2 are the same ligands, but in different positions, Fig. 1. pyN4 = 2-(1*H*-tetrazol-5-yl)pyridinato, Scheme 1.

**Table S5** Frontier molecular orbital energies (eV) and compositions (%) of different fragments in the ground state for complex **1a'**

| MO <sup>a</sup> | Energy/eV | MO composition(%) <sup>b</sup> |      |                   |                   | Assign                             |
|-----------------|-----------|--------------------------------|------|-------------------|-------------------|------------------------------------|
|                 |           | Ir                             | fpmi | pyN1 <sub>a</sub> | pyN1 <sub>b</sub> |                                    |
| L+3             | -0.29     | 1                              | 15   | 3                 | 81                | $\pi^*(\text{fpmi}+\text{pyN1}_b)$ |
| L+2             | -0.36     | 1                              | 8    | 91                | 1                 | $\pi^*(\text{pyN1}_a)$             |
| L+1             | -0.80     | 4                              | 0    | 5                 | 91                | $\pi^*(\text{pyN1}_b)$             |
| L               | -0.89     | 3                              | 1    | 92                | 4                 | $\pi^*(\text{pyN1}_a)$             |
| H               | -4.91     | 3                              | 1    | 3                 | 93                | $\pi(\text{pyN1}_b)$               |
| H-1             | -5.09     | 2                              | 1    | 93                | 4                 | $\pi(\text{pyN1}_a)$               |
| H-2             | -5.32     | 31                             | 3    | 26                | 40                | $d(\text{Ir})+\pi(\text{pyN1})$    |
| H-3             | -5.71     | 26                             | 68   | 2                 | 4                 | $d(\text{Ir})+\pi(\text{fpmi})$    |
| H-4             | -5.93     | 3                              | 3    | 54                | 40                | $\pi(\text{pyN1})$                 |
| H-5             | -6.22     | 39                             | 48   | 7                 | 7                 | $d(\text{Ir})+\pi(\text{fpmi})$    |
| H-6             | -6.53     | 29                             | 63   | 6                 | 2                 | $d(\text{Ir})+\pi(\text{fpmi})$    |

<sup>a</sup> H = HOMO; L= LUMO. <sup>b</sup> pyN1<sub>a</sub> and pyN1<sub>b</sub> are the same ligands, but in different positions, Fig. 1. pyN1 = 2-(1*H*-pyrrol-2-yl)pyridinato, Scheme 1.

**Table S6** Frontier molecular orbital energies (eV) and compositions (%) of different fragments in the ground state for complex **2a'**

| MO <sup>a</sup> | Energy/eV | MO composition(%) <sup>b</sup> |      |                   |                   | Assign                                        |
|-----------------|-----------|--------------------------------|------|-------------------|-------------------|-----------------------------------------------|
|                 |           | Ir                             | fpmi | pyN2 <sub>a</sub> | pyN2 <sub>b</sub> |                                               |
| L+6             | 0.76      | 15                             | 74   | 5                 | 6                 | $d(\text{Ir})+\pi^*(\text{fpmi})$             |
| L+5             | 0.26      | 5                              | 91   | 2                 | 2                 | $\pi^*(\text{fpmi})$                          |
| L+4             | -0.26     | 7                              | 89   | 2                 | 3                 | $\pi^*(\text{fpmi})$                          |
| L+3             | -0.46     | 1                              | 2    | 7                 | 91                | $\pi^*(\text{pyN2}_b)$                        |
| L+2             | -0.47     | 1                              | 4    | 90                | 6                 | $\pi^*(\text{pyN2}_a)$                        |
| L+1             | -1.00     | 4                              | 0    | 28                | 68                | $\pi^*(\text{pyN2})$                          |
| L               | -1.07     | 3                              | 1    | 68                | 28                | $\pi^*(\text{pyN2})$                          |
| H               | -5.36     | 29                             | 3    | 24                | 44                | $d(\text{Ir})+\pi(\text{pyN2})$               |
| H-1             | -5.66     | 13                             | 15   | 11                | 60                | $d(\text{Ir})+\pi(\text{fpmi}+\text{pyN2})$   |
| H-2             | -5.76     | 12                             | 31   | 49                | 9                 | $d(\text{Ir})+\pi(\text{fpmi}+\text{pyN2}_a)$ |
| H-3             | -5.88     | 7                              | 30   | 37                | 25                | $\pi(\text{fpmi}+\text{pyN2})$                |
| H-4             | -6.17     | 4                              | 5    | 54                | 37                | $\pi(\text{pyN2})$                            |
| H-5             | -6.30     | 34                             | 45   | 10                | 12                | $d(\text{Ir})+\pi(\text{fpmi}+\text{pyN2})$   |
| H-6             | -6.60     | 25                             | 62   | 5                 | 7                 | $d(\text{Ir})+\pi(\text{fpmi})$               |

<sup>a</sup> H = HOMO; L= LUMO. <sup>b</sup> pyN2<sub>a</sub> and pyN2<sub>b</sub> are the same ligands, but in different positions, Fig. 1. pyN2 = 2-(1*H*-pyrazol-5-yl)pyridinato, Scheme 1.

**Table S7** Frontier molecular orbital energies (eV) and compositions (%) of different fragments in the ground state for complex **3a'**

| MO <sup>a</sup> | Energy/eV | MO composition(%) <sup>b</sup> |      |                   |                   | Assign                                        |
|-----------------|-----------|--------------------------------|------|-------------------|-------------------|-----------------------------------------------|
|                 |           | Ir                             | fpmi | pyN3 <sub>a</sub> | pyN3 <sub>b</sub> |                                               |
| L+5             | 0.02      | 5                              | 92   | 2                 | 2                 | $\pi^*(\text{fpmi})$                          |
| L+4             | -0.51     | 7                              | 89   | 2                 | 2                 | $\pi^*(\text{fpmi})$                          |
| L+3             | -0.72     | 1                              | 0    | 66                | 32                | $\pi^*(\text{pyN3})$                          |
| L+2             | -0.74     | 1                              | 5    | 30                | 64                | $\pi^*(\text{pyN3})$                          |
| L+1             | -1.31     | 4                              | 0    | 31                | 64                | $\pi^*(\text{pyN3})$                          |
| L               | -1.38     | 3                              | 1    | 65                | 32                | $\pi^*(\text{pyN3})$                          |
| H               | -5.79     | 25                             | 3    | 23                | 49                | $d(\text{Ir})+\pi(\text{pyN3})$               |
| H-1             | -6.03     | 23                             | 69   | 5                 | 3                 | $d(\text{Ir})+\pi(\text{fpmi})$               |
| H-2             | -6.13     | 4                              | 7    | 53                | 36                | $\pi(\text{pyN3})$                            |
| H-3             | -6.56     | 32                             | 48   | 12                | 8                 | $d(\text{Ir})+\pi(\text{fpmi}+\text{pyN3}_a)$ |
| H-4             | -6.64     | 24                             | 8    | 31                | 37                | $d(\text{Ir})+\pi(\text{pyN3})$               |
| H-5             | -6.87     | 27                             | 62   | 7                 | 5                 | $d(\text{Ir})+\pi(\text{fpmi})$               |

<sup>a</sup> H = HOMO; L = LUMO. <sup>b</sup> pyN3<sub>a</sub> and pyN3<sub>b</sub> are the same ligands, but in different positions, Fig. 1. pyN3 = 2-(1*H*-1,2,4-triazol-5-yl)pyridinato, Scheme 1.

**Table S8** Frontier molecular orbital energies (eV) and compositions (%) of different fragments in the ground state for complex **4a'**

| MO <sup>a</sup> | Energy/eV | MO composition(%) <sup>b</sup> |      |                   |                   | Assign                                      |
|-----------------|-----------|--------------------------------|------|-------------------|-------------------|---------------------------------------------|
|                 |           | Ir                             | fpmi | pyN4 <sub>a</sub> | pyN4 <sub>b</sub> |                                             |
| L+5             | -0.29     | 4                              | 93   | 2                 | 1                 | $\pi^*(\text{fpmi})$                        |
| L+4             | -0.83     | 7                              | 90   | 1                 | 2                 | $\pi^*(\text{fpmi})$                        |
| L+3             | -1.12     | 1                              | 1    | 83                | 15                | $\pi^*(\text{pyN4})$                        |
| L+2             | -1.15     | 0                              | 3    | 14                | 82                | $\pi^*(\text{pyN4})$                        |
| L+1             | -1.74     | 4                              | 0    | 41                | 55                | $\pi^*(\text{pyN4})$                        |
| L               | -1.80     | 3                              | 1    | 56                | 41                | $\pi^*(\text{pyN4})$                        |
| H               | -6.35     | 20                             | 74   | 3                 | 3                 | $d(\text{Ir})+\pi(\text{fpmi})$             |
| H-1             | -6.60     | 37                             | 5    | 22                | 37                | $d(\text{Ir})+\pi(\text{pyN4})$             |
| H-2             | -6.79     | 28                             | 34   | 17                | 21                | $d(\text{Ir})+\pi(\text{fpmi}+\text{pyN4})$ |
| H-3             | -6.99     | 7                              | 9    | 32                | 52                | $\pi(\text{pyN4})$                          |
| H-4             | -7.04     | 12                             | 35   | 24                | 29                | $d(\text{Ir})+\pi(\text{fpmi}+\text{pyN4})$ |
| H-5             | -7.18     | 14                             | 7    | 37                | 42                | $d(\text{Ir})+\pi(\text{pyN4})$             |

<sup>a</sup> H = HOMO; L = LUMO. <sup>b</sup> pyN4<sub>a</sub> and pyN4<sub>b</sub> are the same ligands, but in different positions, Fig. 1. pyN4 = 2-(1*H*-tetrazol-5-yl)pyridinato, Scheme 1.

**Table S9** Selected calculated wavelength ( $\lambda$ , in nm)/energies ( $E$ , in eV), oscillator strength ( $f$ ), major contribution and transition characters for the (fpmi)<sub>2</sub>Ir(N<sup>N</sup>) complexes in CH<sub>2</sub>Cl<sub>2</sub> media, along with the experimental data for **2a**

|                | state           | $\lambda/E$ | $f$        | Configuration <sup>a</sup>                                                                                 | Assignment                                                                                                  | Exptl <sup>b</sup> |
|----------------|-----------------|-------------|------------|------------------------------------------------------------------------------------------------------------|-------------------------------------------------------------------------------------------------------------|--------------------|
| <b>1a</b>      | S <sub>1</sub>  | 347/3.57    | 0.0908     | H→L(81%)                                                                                                   | $\pi(\text{pyN1})\rightarrow\pi^*(\text{pyN1})/\text{IL}$                                                   |                    |
|                | S <sub>3</sub>  | 320/3.88    | 0.0526     | H-2→L(95%)                                                                                                 | $d(\text{Ir})+\pi(\text{fpmi}+\text{pyN1})\rightarrow\pi^*(\text{pyN1})/\text{MLCT}/\text{LLCT}/\text{IL}$  |                    |
|                | S <sub>4</sub>  | 306/4.05    | 0.1541     | H→L+1(71%)                                                                                                 | $\pi(\text{pyN1})\rightarrow\pi^*(\text{pyN1})/\text{IL}$                                                   |                    |
|                | S <sub>7</sub>  | 288/4.31    | 0.0735     | H-1→L+3(26%)                                                                                               | $d(\text{Ir})+\pi(\text{fpmi}+\text{pyN1})\rightarrow\pi^*(\text{fpmi})/\text{MLCT}/\text{LLCT}/\text{IL}$  |                    |
|                |                 |             |            | H→L+3(18%)                                                                                                 | $\pi(\text{pyN1})\rightarrow\pi^*(\text{fpmi})/\text{LLCT}$                                                 |                    |
|                |                 |             |            | H-3→L(18%)                                                                                                 | $d(\text{Ir})+\pi(\text{fpmi}+\text{pyN1})\rightarrow\pi^*(\text{pyN1})/\text{MLCT}/\text{LLCT}/\text{IL}$  |                    |
|                | S <sub>10</sub> | 285/4.36    | 0.0702     | H-2→L+1(66%)                                                                                               | $d(\text{Ir})+\pi(\text{fpmi}+\text{pyN1})\rightarrow\pi^*(\text{pyN1})/\text{MLCT}/\text{LLCT}/\text{IL}$  |                    |
|                | S <sub>15</sub> | 270/4.60    | 0.0694     | H-1→L+4(50%)                                                                                               | $d(\text{Ir})+\pi(\text{fpmi}+\text{pyN1})\rightarrow\pi^*(\text{fpmi})/\text{MLCT}/\text{LLCT}/\text{IL}$  |                    |
|                |                 |             |            | H→L+4(28%)                                                                                                 | $\pi(\text{pyN1})\rightarrow\pi^*(\text{fpmi})/\text{LLCT}$                                                 |                    |
|                | S <sub>19</sub> | 256/4.84    | 0.0624     | H-3→L+2(47%)                                                                                               | $d(\text{Ir})+\pi(\text{fpmi}+\text{pyN1})\rightarrow\pi^*(\text{fpmi})/\text{MLCT}/\text{LLCT}/\text{IL}$  |                    |
| H-2→L+4(17%)   |                 |             |            | $d(\text{Ir})+\pi(\text{fpmi}+\text{pyN1})\rightarrow\pi^*(\text{fpmi})/\text{MLCT}/\text{LLCT}/\text{IL}$ |                                                                                                             |                    |
| T <sub>1</sub> | 463/2.68        | 0.0000      | H→L(74%)   | $\pi(\text{pyN1})\rightarrow\pi^*(\text{pyN1})/\text{IL}$                                                  |                                                                                                             |                    |
| <b>2a</b>      | S <sub>1</sub>  | 357/3.48    | 0.0043     | H→L(96%)                                                                                                   | $d(\text{Ir})+\pi(\text{fpmi})\rightarrow\pi^*(\text{pyN2})/\text{MLCT}/\text{LLCT}$                        | 379                |
|                | S <sub>2</sub>  | 338/3.67    | 0.0530     | H-1→L(93%)                                                                                                 | $d(\text{Ir})+\pi(\text{fpmi}+\text{pyN2})\rightarrow\pi^*(\text{pyN2})/\text{MLCT}/\text{LLCT}/\text{IL}$  |                    |
|                | S <sub>3</sub>  | 311/3.98    | 0.0607     | H-2→L(85%)                                                                                                 | $d(\text{Ir})+\pi(\text{fpmi}+\text{pyN2})\rightarrow\pi^*(\text{pyN2})/\text{MLCT}/\text{LLCT}/\text{IL}$  |                    |
|                | S <sub>5</sub>  | 296/4.19    | 0.0640     | H-3→L(45%)                                                                                                 | $\pi(\text{fpmi}+\text{pyN2})\rightarrow\pi^*(\text{pyN2})/\text{LLCT}/\text{IL}$                           | 304                |
|                |                 |             |            | H→L+2(35%)                                                                                                 | $d(\text{Ir})+\pi(\text{fpmi})\rightarrow\pi^*(\text{fpmi1})/\text{MLCT}/\text{LLCT}/\text{IL}$             |                    |
|                | S <sub>11</sub> | 274/4.53    | 0.1100     | H-2→L+1(70%)                                                                                               | $d(\text{Ir})+\pi(\text{fpmi}+\text{pyN2})\rightarrow\pi^*(\text{pyN2})/\text{MLCT}/\text{LLCT}/\text{IL}$  |                    |
|                | S <sub>15</sub> | 262/4.74    | 0.0641     | H-3→L+1(62%)                                                                                               | $\pi(\text{fpmi}+\text{pyN2})\rightarrow\pi^*(\text{pyN2})/\text{LLCT}/\text{IL}$                           |                    |
|                | S <sub>16</sub> | 260/4.77    | 0.1239     | H-2→L+2(50%)                                                                                               | $d(\text{Ir})+\pi(\text{fpmi}+\text{pyN2})\rightarrow\pi^*(\text{fpmi1})/\text{MLCT}/\text{LLCT}/\text{IL}$ | 280                |
| T <sub>1</sub> | 417/2.97        | 0.0000      | H-2→L(34%) | $d(\text{Ir})+\pi(\text{fpmi}+\text{pyN2})\rightarrow\pi^*(\text{pyN2})/\text{MLCT}/\text{LLCT}/\text{IL}$ | 432                                                                                                         |                    |
| <b>3a</b>      | S <sub>1</sub>  | 366/3.39    | 0.0012     | H→L(97%)                                                                                                   | $d(\text{Ir})+\pi(\text{fpmi})\rightarrow\pi^*(\text{pyN3})/\text{MLCT}/\text{LLCT}$                        |                    |
|                | S <sub>2</sub>  | 338/3.67    | 0.0660     | H-1→L(86%)                                                                                                 | $d(\text{Ir})+\pi(\text{fpmi}+\text{pyN3})\rightarrow\pi^*(\text{pyN3})/\text{MLCT}/\text{LLCT}/\text{IL}$  |                    |
|                | S <sub>6</sub>  | 292/4.24    | 0.0560     | H-3→L(72%)                                                                                                 | $d(\text{Ir})+\pi(\text{fpmi}+\text{pyN3})\rightarrow\pi^*(\text{pyN3})/\text{MLCT}/\text{LLCT}/\text{IL}$  |                    |
|                | S <sub>9</sub>  | 279/4.44    | 0.0612     | H-4→L(80%)                                                                                                 | $d(\text{Ir})+\pi(\text{fpmi}+\text{pyN3})\rightarrow\pi^*(\text{pyN3})/\text{MLCT}/\text{LLCT}/\text{IL}$  |                    |
|                | S <sub>13</sub> | 265/4.68    | 0.1405     | H→L+4(63%)                                                                                                 | $d(\text{Ir})+\pi(\text{fpmi})\rightarrow\pi^*(\text{fpmi})/\text{MLCT}/\text{LLCT}/\text{IL}$              |                    |
|                | S <sub>15</sub> | 259/4.80    | 0.1112     | H-2→L+2(64%)                                                                                               | $d(\text{Ir})+\pi(\text{fpmi}+\text{pyN3})\rightarrow\pi^*(\text{fpmi1})/\text{MLCT}/\text{LLCT}/\text{IL}$ |                    |
|                | T <sub>1</sub>  | 413/3.00    | 0.0000     | H-2→L(25%)                                                                                                 | $d(\text{Ir})+\pi(\text{fpmi}+\text{pyN3})\rightarrow\pi^*(\text{pyN3})/\text{MLCT}/\text{LLCT}/\text{IL}$  |                    |
| <b>4a</b>      | S <sub>1</sub>  | 376/3.30    | 0.0005     | H→L(97%)                                                                                                   | $d(\text{Ir})+\pi(\text{fpmi})\rightarrow\pi^*(\text{pyN4})/\text{MLCT}/\text{LLCT}$                        |                    |
|                | S <sub>2</sub>  | 338/3.67    | 0.0465     | H-1→L(87%)                                                                                                 | $d(\text{Ir})+\pi(\text{fpmi})\rightarrow\pi^*(\text{pyN4})/\text{MLCT}/\text{LLCT}$                        |                    |
|                | S <sub>6</sub>  | 294/4.22    | 0.0443     | H-3→L(75%)                                                                                                 | $d(\text{Ir})+\pi(\text{fpmi}+\text{pyN4})\rightarrow\pi^*(\text{pyN4})/\text{MLCT}/\text{LLCT}/\text{IL}$  |                    |
|                | S <sub>13</sub> | 263/4.71    | 0.2014     | H→L+4(45%)                                                                                                 | $d(\text{Ir})+\pi(\text{fpmi})\rightarrow\pi^*(\text{fpmi})/\text{MLCT}/\text{LLCT}/\text{IL}$              |                    |
|                |                 |             |            | H-6→L(25%)                                                                                                 | $\pi(\text{fpmi})\rightarrow\pi^*(\text{pyN4})/\text{LLCT}$                                                 |                    |
|                | S <sub>16</sub> | 257/4.82    | 0.1255     | H-2→L+2(71%)                                                                                               | $d(\text{Ir})+\pi(\text{fpmi})\rightarrow\pi^*(\text{fpmi1})/\text{MLCT}/\text{LLCT}/\text{IL}$             |                    |
| T <sub>1</sub> | 392/3.16        | 0.0000      | H→L(40%)   | $d(\text{Ir})+\pi(\text{fpmi})\rightarrow\pi^*(\text{pyN4})/\text{MLCT}/\text{LLCT}$                       |                                                                                                             |                    |

<sup>a</sup> H = HOMO; L = LUMO. <sup>b</sup> Experimental data from Ref. 11.

**Table S10** Selected calculated wavelength ( $\lambda$ , in nm)/energies ( $E$ , in eV), oscillator strength ( $f$ ), major contribution and transition characters for the  $(N^N)_2Ir(fpmi)$  complexes in  $CH_2Cl_2$  media

|                 | state           | $\lambda/E$ | $f$          | Configuration <sup>a</sup>                                    | Assignment                                                      |
|-----------------|-----------------|-------------|--------------|---------------------------------------------------------------|-----------------------------------------------------------------|
| <b>1a'</b>      | S <sub>1</sub>  | 360/3.44    | 0.0972       | H→L(64%)                                                      | $\pi(pyN1_b) \rightarrow \pi^*(pyN1_a)/LLCT$                    |
|                 |                 |             |              | H→L+1(19%)                                                    | $\pi(pyN1_b) \rightarrow \pi^*(pyN1_b)/IL$                      |
|                 | S <sub>5</sub>  | 336/3.69    | 0.0647       | H-2→L(82%)                                                    | $d(Ir)+\pi(pyN1) \rightarrow \pi^*(pyN1_a)/MLCT/LLCT/IL$        |
|                 | S <sub>10</sub> | 302/4.10    | 0.1320       | H→L+3(37%)                                                    | $\pi(pyN1_b) \rightarrow \pi^*(fpmi+pyN1_b)/LLCT/IL$            |
|                 |                 |             |              | H-3→L+1(34%)                                                  | $d(Ir)+\pi(fpmi) \rightarrow \pi^*(pyN1_b)/MLCT/LLCT$           |
|                 | S <sub>11</sub> | 298/4.16    | 0.1778       | H-1→L+2(61%)                                                  | $\pi(pyN1_a) \rightarrow \pi^*(pyN1_a)/IL$                      |
|                 | S <sub>19</sub> | 281/4.41    | 0.1384       | H-4→L+1(77%)                                                  | $\pi(pyN1) \rightarrow \pi^*(pyN1_b)/LLCT/IL$                   |
|                 | S <sub>22</sub> | 273/4.54    | 0.0911       | H-5→L+1(58%)                                                  | $d(Ir)+\pi(fpmi) \rightarrow \pi^*(pyN1_b)/MLCT/LLCT$           |
|                 | S <sub>29</sub> | 254/4.88    | 0.0935       | H-6→L(70%)                                                    | $d(Ir)+\pi(fpmi) \rightarrow \pi^*(pyN1_a)/MLCT/LLCT$           |
|                 | T <sub>1</sub>  | 478/2.59    | 0.0000       | H→L+1(54%)                                                    | $\pi(pyN1_b) \rightarrow \pi^*(pyN1_b)/IL$                      |
| <b>2a'</b>      | S <sub>1</sub>  | 356/3.48    | 0.0607       | H→L(97%)                                                      | $d(Ir)+\pi(pyN2) \rightarrow \pi^*(pyN2)/MLCT/LLCT/IL$          |
|                 | S <sub>5</sub>  | 310/4.00    | 0.0899       | H-2→L(89%)                                                    | $d(Ir)+\pi(fpmi+pyN2_a) \rightarrow \pi^*(pyN2)/MLCT/LLCT/IL$   |
|                 | S <sub>6</sub>  | 307/4.04    | 0.0758       | H-2→L+1(88%)                                                  | $d(Ir)+\pi(fpmi+pyN2_a) \rightarrow \pi^*(pyN2)/MLCT/LLCT/IL$   |
|                 | S <sub>12</sub> | 286/4.33    | 0.0565       | H-4→L+1(56%)                                                  | $\pi(pyN2) \rightarrow \pi^*(pyN2)/LLCT/IL$                     |
|                 |                 |             |              | H-4→L(22%)                                                    | $\pi(pyN2) \rightarrow \pi^*(pyN2)/LLCT/IL$                     |
|                 | S <sub>14</sub> | 277/4.47    | 0.0791       | H-1→L+2(52%)                                                  | $d(Ir)+\pi(fpmi+pyN2) \rightarrow \pi^*(pyN2_a)/MLCT/LLCT/IL$   |
|                 |                 |             |              | H-1→L+3(26%)                                                  | $d(Ir)+\pi(fpmi+pyN2) \rightarrow \pi^*(pyN2_b)/MLCT/LLCT/IL$   |
|                 | S <sub>21</sub> | 261/4.75    | 0.1438       | H-2→L+2(27%)                                                  | $d(Ir)+\pi(fpmi+pyN2_a) \rightarrow \pi^*(pyN2_a)/MLCT/LLCT/IL$ |
|                 |                 |             |              | H→L+6(19%)                                                    | $d(Ir)+\pi(pyN2) \rightarrow \pi^*(fpmi)/MLCT/LLCT$             |
|                 | S <sub>22</sub> | 260/4.77    | 0.1692       | H-6→L(34%)                                                    | $d(Ir)+\pi(fpmi) \rightarrow \pi^*(pyN2)/MLCT/LLCT$             |
| H-2→L+3(24%)    |                 |             |              | $d(Ir)+\pi(fpmi+pyN2_a) \rightarrow \pi^*(pyN2_b)/MLCT/LLCT$  |                                                                 |
| H→L+6(22%)      |                 |             |              | $d(Ir)+\pi(pyN2) \rightarrow \pi^*(fpmi)/MLCT/LLCT$           |                                                                 |
| T <sub>1</sub>  | 423/2.93        | 0.0000      | H-2→L(17%)   | $d(Ir)+\pi(fpmi+pyN2_a) \rightarrow \pi^*(pyN2)/MLCT/LLCT/IL$ |                                                                 |
|                 |                 |             | H→L(15%)     | $d(Ir)+\pi(pyN2) \rightarrow \pi^*(pyN2)/MLCT/LLCT/IL$        |                                                                 |
|                 |                 |             | H-2→L+1(15%) | $d(Ir)+\pi(fpmi+pyN2_a) \rightarrow \pi^*(pyN2)/MLCT/LLCT/IL$ |                                                                 |
| <b>3a'</b>      | S <sub>1</sub>  | 345/3.60    | 0.0539       | H→L(67%)                                                      | $d(Ir)+\pi(pyN3) \rightarrow \pi^*(pyN3)/MLCT/LLCT/IL$          |
|                 |                 |             |              | H-1→L(28%)                                                    | $d(Ir)+\pi(fpmi) \rightarrow \pi^*(pyN3)/MLCT/LLCT$             |
|                 | S <sub>3</sub>  | 332/3.74    | 0.0738       | H-1→L(66%)                                                    | $d(Ir)+\pi(fpmi) \rightarrow \pi^*(pyN3)/MLCT/LLCT$             |
|                 |                 |             |              | H→L(29%)                                                      | $d(Ir)+\pi(pyN3) \rightarrow \pi^*(pyN3)/MLCT/LLCT/IL$          |
|                 | S <sub>5</sub>  | 304/4.08    | 0.0495       | H-2→L(85%)                                                    | $\pi(pyN3) \rightarrow \pi^*(pyN3)/LLCT/IL$                     |
|                 | S <sub>9</sub>  | 282/4.40    | 0.1516       | H→L+2(41%)                                                    | $d(Ir)+\pi(pyN3) \rightarrow \pi^*(pyN3)/MLCT/LLCT/IL$          |
|                 |                 |             |              | H-1→L+2(28%)                                                  | $d(Ir)+\pi(fpmi) \rightarrow \pi^*(pyN3)/MLCT/LLCT$             |
|                 |                 |             |              | H-3→L+1(20%)                                                  | $d(Ir)+\pi(fpmi+pyN3_a) \rightarrow \pi^*(pyN3)/MLCT/LLCT/IL$   |
|                 | S <sub>13</sub> | 273/4.54    | 0.0342       | H→L+4(84%)                                                    | $d(Ir)+\pi(pyN3) \rightarrow \pi^*(fpmi)/MLCT/LLCT$             |
|                 | S <sub>18</sub> | 264/4.69    | 0.0596       | H-5→L+1(74%)                                                  | $d(Ir)+\pi(fpmi) \rightarrow \pi^*(pyN3)/MLCT/LLCT$             |
| S <sub>21</sub> | 255/4.86        | 0.2550      | H-2→L+3(68%) | $\pi(pyN3) \rightarrow \pi^*(pyN3)/LLCT/IL$                   |                                                                 |
| T <sub>1</sub>  | 417/2.97        | 0.0000      | H→L(18%)     | $d(Ir)+\pi(pyN3) \rightarrow \pi^*(pyN3)/MLCT/LLCT/IL$        |                                                                 |
| <b>4a'</b>      | S <sub>1</sub>  | 343/3.62    | 0.0164       | H→L(96%)                                                      | $d(Ir)+\pi(fpmi) \rightarrow \pi^*(pyN4)/MLCT/LLCT$             |

|                 |          |        |              |                                          |
|-----------------|----------|--------|--------------|------------------------------------------|
| S <sub>3</sub>  | 313/3.96 | 0.0727 | H-2→L(87%)   | d(Ir)+π(fpmi+pyN4)→π*(pyN4)/MLCT/LLCT/IL |
| S <sub>6</sub>  | 302/4.11 | 0.0454 | H-1→L+1(77%) | d(Ir)+π(pyN4)→π*(pyN4)/MLCT/LLCT/IL      |
| S <sub>13</sub> | 266/4.67 | 0.1228 | H-4→L+1(58%) | d(Ir)+π(fpmi+pyN4)→π*(pyN4)/MLCT/LLCT/IL |
| S <sub>19</sub> | 253/4.91 | 0.1197 | H-1→L+3(44%) | d(Ir)+π(pyN4)→π*(pyN4)/MLCT/LLCT/IL      |
|                 |          |        | H-5→L(30%)   | d(Ir)+π(pyN4)→π*(pyN4)/MLCT/LLCT/IL      |
| T <sub>1</sub>  | 389/3.19 | 0.0000 | H-1→L(10%)   | d(Ir)+π(pyN4)→π*(pyN4)/MLCT/LLCT/IL      |
|                 |          |        | H→L(9%)      | d(Ir)+π(fpmi)→π*(pyN4)/MLCT/LLCT         |

<sup>a</sup> H = HOMO; L = LUMO.

**Table S11** Calculated phosphorescent emission of the studied complexes in CH<sub>3</sub>CN media at TDDFT/M06-2X level of theory ( $\lambda$ , in nm;  $E$ , in eV)

|            | $\lambda/E$ | Configuration <sup>a</sup>         | Nature  | Exptl <sup>b</sup> |
|------------|-------------|------------------------------------|---------|--------------------|
| <b>1a</b>  | 497/2.49    | H→L(95%)                           | IL      |                    |
| <b>2a</b>  | 459/2.70    | H→L(65%); H-1→L(22%)               | MLCT/IL | 468                |
| <b>3a</b>  | 460/2.70    | H→L(36%); H-1→L(36%); H-2→L(16%)   | MLCT/IL |                    |
| <b>4a</b>  | 421/2.95    | H-3→L(42%); H-2→L(17%); H-4→L(17%) | MLCT/IL |                    |
| <b>1a'</b> | 462/2.68    | H→L(54%); H-1→L+1(32%)             | LLCT/IL |                    |
| <b>2a'</b> | 466/2.66    | H→L(87%)                           | MLCT/IL |                    |
| <b>3a'</b> | 470/2.64    | H→L(86%)                           | MLCT/IL |                    |
| <b>4a'</b> | 440/2.82    | H-1→L(82%)                         | MLCT/IL |                    |

<sup>a</sup> H = HOMO; L = LUMO. <sup>b</sup> Experimental data from Ref. 11.

**Table S12** Calculated phosphorescent emission of the studied complexes in toluene media at TDDFT/M06-2X level of theory ( $\lambda$ , in nm;  $E$ , in eV)

|            | $\lambda/E$ | Configuration <sup>a</sup>         | Nature  | Exptl <sup>b</sup> |
|------------|-------------|------------------------------------|---------|--------------------|
| <b>1a</b>  | 511/2.43    | H→L(95%)                           | IL      |                    |
| <b>2a</b>  | 470/2.64    | H→L(53%); H-1→L(36%)               | MLCT/IL | 468                |
| <b>3a</b>  | 471/2.63    | H-1→L(48%); H→L(33%)               | MLCT/IL |                    |
| <b>4a</b>  | 429/2.89    | H-3→L(44%); H-2→L(25%)             | MLCT/IL |                    |
| <b>1a'</b> | 485/2.56    | H→L+1(34%); H→L(28%); H-1→L+1(22%) | LLCT/IL |                    |
| <b>2a'</b> | 478/2.59    | H→L(89%)                           | MLCT/IL |                    |
| <b>3a'</b> | 480/2.58    | H→L(89%)                           | MLCT/IL |                    |
| <b>4a'</b> | 447/2.77    | H-1→L(71%); H→L(20%)               | MLCT/IL |                    |

<sup>a</sup> H = HOMO; L = LUMO. <sup>b</sup> Experimental data from Ref. 11.



**Table S13:** Selected bond lengths (in Å) calculated for the studied complexes in the metal-centered ( $^3MC$ ) triplet excited states

|            | Ir-C1 | Ir-C2 | Ir-C3/Ir-N3 | Ir-C4/Ir-N4 | Ir-N1 | Ir-N2 |
|------------|-------|-------|-------------|-------------|-------|-------|
| <b>1a</b>  | 2.023 | 2.039 | 2.020       | 2.065       | 2.129 | 3.130 |
| <b>2a</b>  | 2.019 | 2.041 | 2.022       | 2.058       | 2.120 | 3.232 |
| <b>3a</b>  | 2.023 | 2.042 | 2.025       | 2.056       | 2.131 | 3.233 |
| <b>4a</b>  | 2.025 | 2.040 | 2.028       | 2.053       | 2.140 | 3.294 |
| <b>1a'</b> | 2.045 | 2.059 | 2.063       | 2.479       | 2.014 | 2.477 |
| <b>2a'</b> | 2.021 | 2.027 | 2.103       | 2.473       | 2.045 | 2.458 |
| <b>3a'</b> | 2.014 | 2.011 | 2.124       | 2.512       | 2.058 | 2.448 |
| <b>4a'</b> | 2.008 | 1.998 | 2.144       | 2.526       | 2.074 | 2.427 |

**Table S14:** The xyz coordinates for the optimized structures for **2a** in the  $S_0$  and  $T_1$  states

| <b>2a</b> | $S_0$       |             |             | $T_1$       |             |             |
|-----------|-------------|-------------|-------------|-------------|-------------|-------------|
| Ir        | 0.12837900  | -0.12331000 | 0.00747300  | 0.12436700  | -0.12616400 | -0.01779900 |
| C         | 2.12127400  | -3.82735800 | -0.51539400 | 2.15065600  | -3.82118200 | -0.48749200 |
| H         | 2.10743700  | -4.90193700 | -0.64970000 | 2.13216100  | -4.89747500 | -0.60908600 |
| C         | 3.21591500  | -2.97154800 | -0.44519800 | 3.23665600  | -2.98405200 | -0.39133200 |
| H         | 4.26664400  | -3.21933400 | -0.51067300 | 4.28606200  | -3.23818900 | -0.41680100 |
| C         | 2.62482700  | -1.71429300 | -0.26143700 | 2.65453300  | -1.69430300 | -0.24020000 |
| C         | 3.12840200  | -0.37474700 | -0.12306800 | 3.14876000  | -0.40174800 | -0.06565300 |
| C         | 4.49027900  | -0.03605000 | -0.14733600 | 4.53046400  | -0.04791400 | -0.03486600 |
| H         | 5.22641600  | -0.82347800 | -0.27213700 | 5.26330400  | -0.84903700 | -0.08961300 |
| C         | 4.87060600  | 1.28689700  | -0.01675700 | 4.91911600  | 1.25550400  | 0.05761600  |
| H         | 5.92274000  | 1.55799100  | -0.03517200 | 5.96713700  | 1.53359100  | 0.08492500  |
| C         | 3.88731400  | 2.26754500  | 0.13414600  | 3.88944000  | 2.26042200  | 0.11188700  |
| H         | 4.14013600  | 3.31773200  | 0.23339300  | 4.13539700  | 3.31514400  | 0.16954800  |
| C         | 2.56033000  | 1.87067900  | 0.15201400  | 2.55179900  | 1.87448100  | 0.09368000  |
| H         | 1.74970000  | 2.58425400  | 0.26879700  | 1.76109800  | 2.61910700  | 0.14890600  |
| C         | -0.02010000 | 0.33568200  | -1.96302000 | -0.02521000 | 0.36926500  | -1.98397000 |
| C         | -0.19179600 | 0.61649000  | -4.18710900 | -0.17310600 | 0.70770300  | -4.20246100 |
| H         | -0.10588200 | 0.34124400  | -5.22710600 | -0.07352300 | 0.46080600  | -5.24832300 |
| C         | -0.65187000 | 1.75347700  | -3.60728700 | -0.64390600 | 1.82689200  | -3.59786700 |
| H         | -1.05233700 | 2.65305100  | -4.04653500 | -1.04153400 | 2.73690400  | -4.01763900 |
| C         | 0.72176700  | -1.57426100 | -3.36786400 | 0.74564100  | -1.49647300 | -3.42830500 |
| H         | 0.37839100  | -2.22829100 | -2.56489300 | 0.38184400  | -2.17620300 | -2.65675300 |

|   |             |             |             |             |             |             |
|---|-------------|-------------|-------------|-------------|-------------|-------------|
| H | 1.81560100  | -1.55612500 | -3.36301700 | 1.83907300  | -1.47098600 | -3.39508400 |
| H | 0.36851000  | -1.95406400 | -4.32930800 | 0.42133800  | -1.84936300 | -4.40995800 |
| C | -0.71502800 | 1.72961300  | 0.10173100  | -0.74016500 | 1.71476800  | 0.10823500  |
| C | -0.91654600 | 2.36565500  | -1.14506900 | -0.93904700 | 2.37479200  | -1.12546000 |
| C | -1.42383800 | 3.64919600  | -1.28889600 | -1.46298200 | 3.65433000  | -1.24488300 |
| H | -1.55746100 | 4.09777500  | -2.27002000 | -1.59391400 | 4.12312500  | -2.21677400 |
| C | -1.76669500 | 4.37411600  | -0.14923100 | -1.82635600 | 4.34792200  | -0.09267000 |
| H | -2.16943400 | 5.37924900  | -0.21005700 | -2.24159600 | 5.34890000  | -0.13435000 |
| C | -1.58184400 | 3.77133600  | 1.08467600  | -1.64587600 | 3.71907000  | 1.12892900  |
| C | -1.07133500 | 2.48547500  | 1.22388600  | -1.11926700 | 2.43776600  | 1.24390900  |
| H | -0.96584700 | 2.08234500  | 2.22748500  | -1.01749700 | 2.01465800  | 2.23937900  |
| C | -0.08237400 | -0.53023700 | 1.99251500  | -0.06199300 | -0.52936600 | 1.96985300  |
| C | -1.29392900 | -1.40520700 | 3.69034100  | -1.26197600 | -1.37502300 | 3.68833100  |
| H | -2.13063500 | -1.88926000 | 4.16757500  | -2.08999400 | -1.86053600 | 4.17909900  |
| C | -0.13491200 | -0.93114100 | 4.20972700  | -0.10757300 | -0.87287800 | 4.19345300  |
| H | 0.23386500  | -0.92558500 | 5.22386900  | 0.26168800  | -0.83701200 | 5.20684400  |
| C | 1.91345300  | 0.17740500  | 3.28950000  | 1.90977300  | 0.27749100  | 3.24485000  |
| H | 2.66870700  | -0.49819500 | 2.87849200  | 2.63701900  | -0.22752500 | 2.60574700  |
| H | 2.12094700  | 0.34800600  | 4.34800000  | 2.23739100  | 0.21639000  | 4.28455100  |
| H | 1.95881500  | 1.12989300  | 2.75934200  | 1.84531200  | 1.32704500  | 2.94809200  |
| C | -1.70649100 | -0.98511500 | 0.03410800  | -1.70271500 | -1.01395600 | 0.02659000  |
| C | -2.57889200 | -1.22192200 | -1.03119600 | -2.58206700 | -1.26948100 | -1.02848300 |
| H | -2.32949900 | -0.92555700 | -2.04548400 | -2.34660000 | -0.97145600 | -2.04589200 |
| C | -3.79864000 | -1.85258000 | -0.82191300 | -3.78851800 | -1.92020300 | -0.80388700 |
| C | -4.22218900 | -2.27307100 | 0.42832200  | -4.19101200 | -2.34248000 | 0.45299700  |
| H | -5.18374700 | -2.76097000 | 0.54375600  | -5.14271200 | -2.84651200 | 0.58039100  |
| C | -3.37724800 | -2.04629900 | 1.51138900  | -3.33961800 | -2.09636100 | 1.52683000  |
| H | -3.68082700 | -2.36561100 | 2.50493900  | -3.62817800 | -2.41651700 | 2.52460300  |
| C | -2.15968200 | -1.41708900 | 1.29759900  | -2.13521100 | -1.44725100 | 1.29753700  |
| F | -1.90662800 | 4.46092800  | 2.19388800  | -1.99175400 | 4.37775000  | 2.25007600  |
| F | -4.60458100 | -2.06200800 | -1.87976500 | -4.60207600 | -2.14916800 | -1.85153100 |
| N | 1.27545300  | -1.88030900 | -0.23433700 | 1.25802600  | -1.87414000 | -0.27428600 |
| N | 0.95678100  | -3.15411700 | -0.38619200 | 0.95425200  | -3.14045500 | -0.41159400 |
| N | 2.18348800  | 0.59021300  | 0.03646000  | 2.14345900  | 0.61238100  | 0.03382000  |
| N | 0.18483600  | -0.24042100 | -3.16787000 | 0.19432600  | -0.17418900 | -3.20119100 |
| N | -0.53756900 | 1.56197900  | -2.24796900 | -0.54542800 | 1.59948200  | -2.24274600 |
| N | -1.24132200 | -1.14944900 | 2.33888900  | -1.21365500 | -1.15432300 | 2.33049400  |
| N | 0.59103800  | -0.39566800 | 3.15971600  | 0.61380500  | -0.36073700 | 3.12961200  |

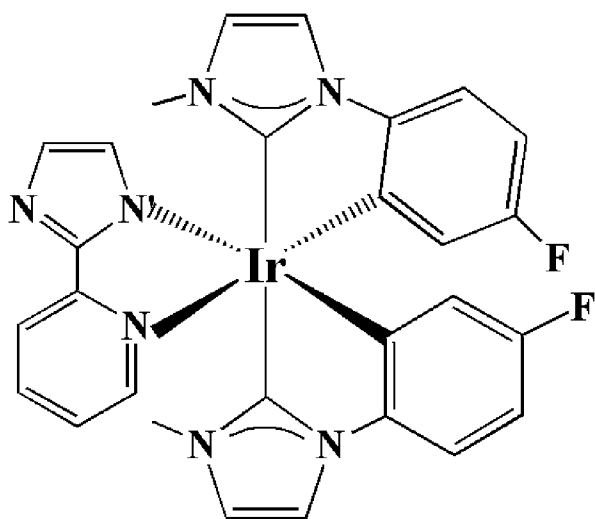

**(fpmi)<sub>2</sub>Ir(pyim) (2b)**

**Fig. S1.** Schematic structures of (fpmi)<sub>2</sub>Ir(pyim) (2b).

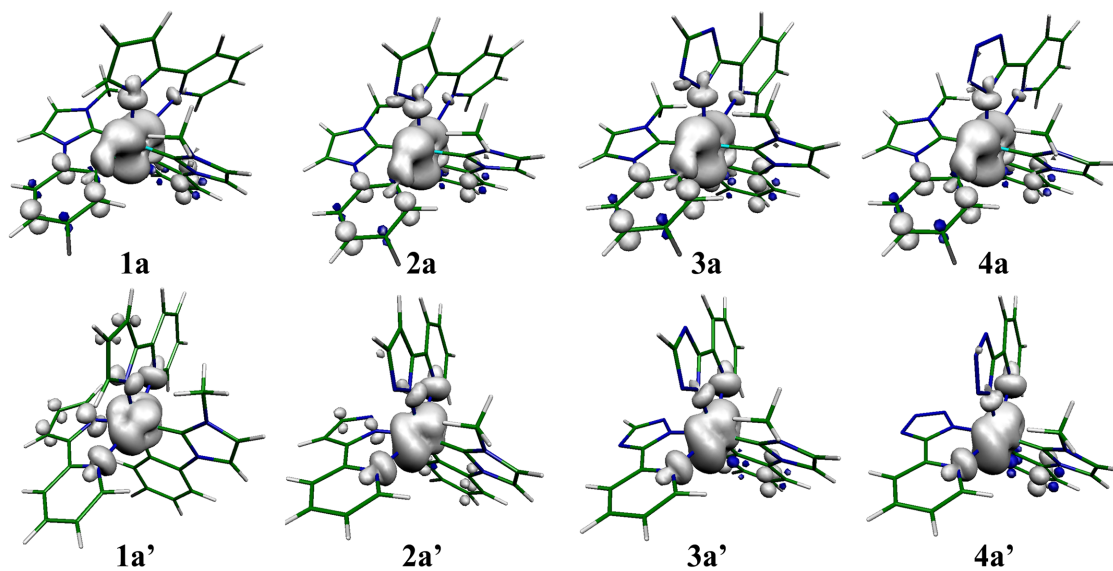

**Fig. S2.** The spin-density contours of the <sup>3</sup>MC d-d state for the studied complexes.
